# Supplementary material
Source: HighWire-hosted journal article supplement (https://mct.aacrjournals.org/content/suppl/2011/11/23/1535-7163.MCT-11-0584)
Supplement: MCT_11-0584_F2.T1_PDF_125K.pdf [file MCT_11-0584_F2.T1_PDF_125K.pdf]

## Supplemental data

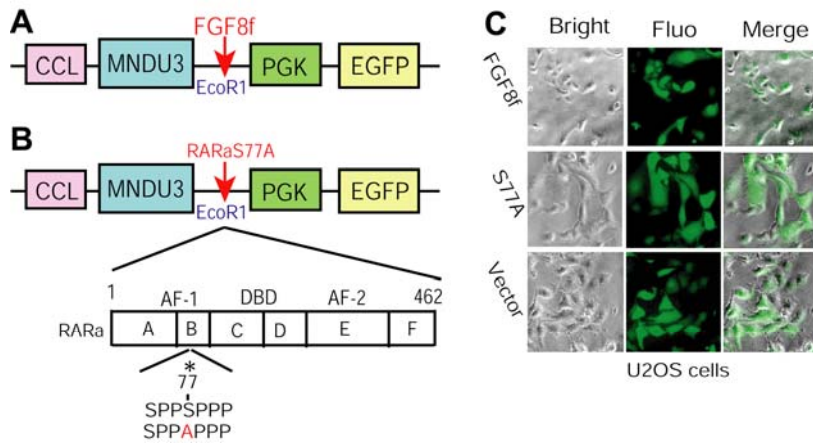

**Supplemental Figure 1.** (A & B) The pCCL lentiviral FGF8f (A) and RAR $\alpha$ S77A (B) constructs with enhanced green fluorescent protein (eGFP). (C) Expression of FGF8f or RAR $\alpha$ S77A in U2OS cells, as reflected by eGFP expression (>95%).

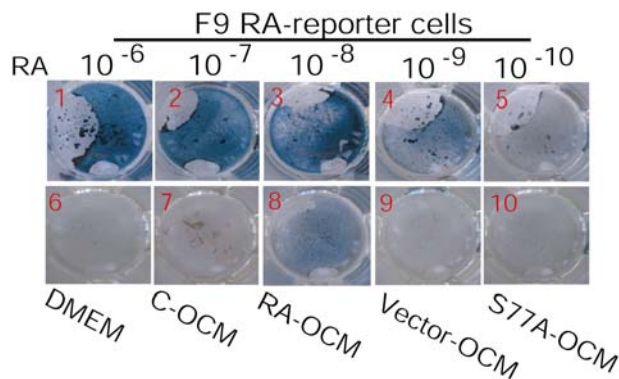

**Supplemental Figure 2.** F9 RA-reporter cells (cultured in DMEM) were incubated with serially diluted RA (top panel). F9 RA-reporter cells were incubated with different OCM of U2OS cells (bottom panel). The retained levels of RA in RA-OCM were less than the physiological levels of  $10^{-9}$  M (wells 4 vs. 8).

| Name        | GenBank no. | Forward              | Reverse              |
|-------------|-------------|----------------------|----------------------|
| osteopontin | X13694.1    | tgaaacgagtcagctggatg | tgaaattcatggctgtggaa |
| GAPDH       | NM_002046.3 | gtcatccatgacaactttgg | gagcttgacaaagtggcgt  |

**Supplemental Table 1.** Primers used for qRT-PCR amplification. The amplification cycle conditions: initial denaturization at 95°C for 15 min followed by consecutive 40 thermal cycles (95°C, 30 s; 58°C, 30 s; and 72°C, 30 s).
